# Supplementary material for: Physiological evaluation and transcriptomic and proteomic analyses to reveal the anti-aging and reproduction-promoting mechanisms of glycitein in Caenorhabditis elegans
Source: Royal Society of Chemistry journal article supplement (doi:10.1039/d4fo02271h), 2024-01-01
Supplement: d4fo02271h1.pdf [file d4fo02271h1.pdf]

1

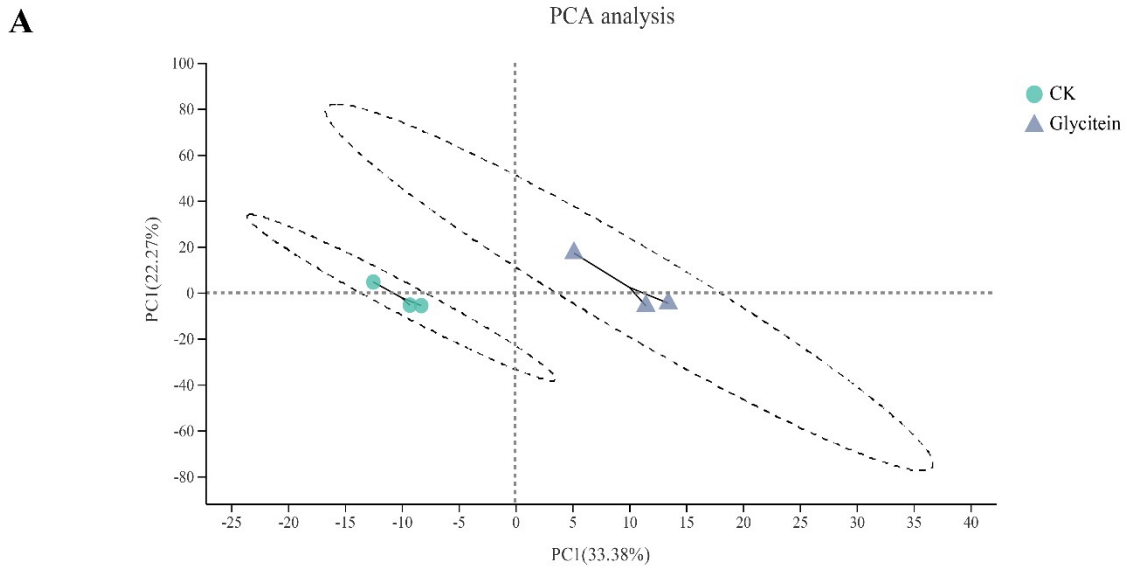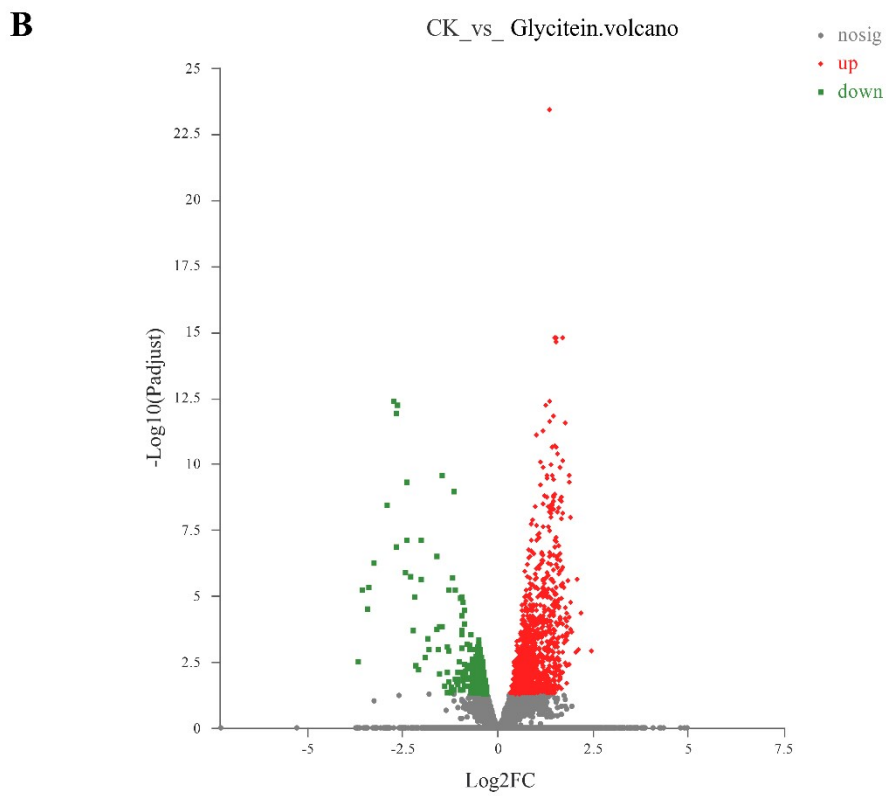

2

3 Fig.S1. (A) PCA analysis and (B) Volcano plot of DEGs based on transcriptomic data.

4

5

6

**A**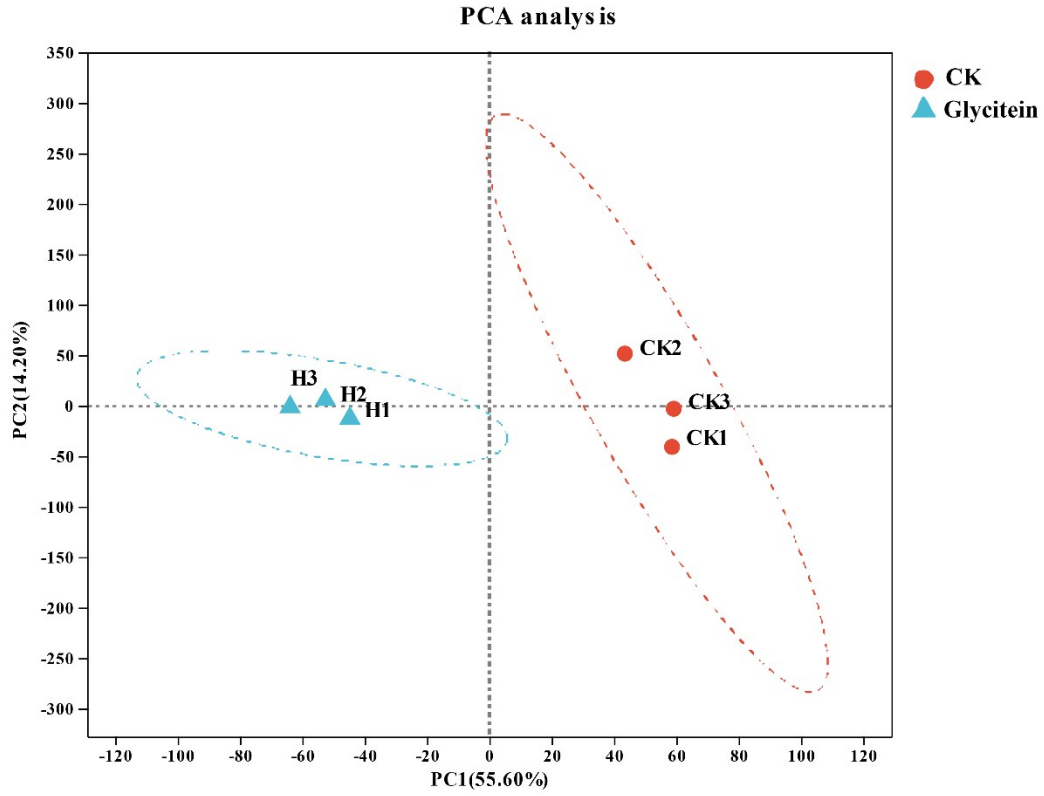**B**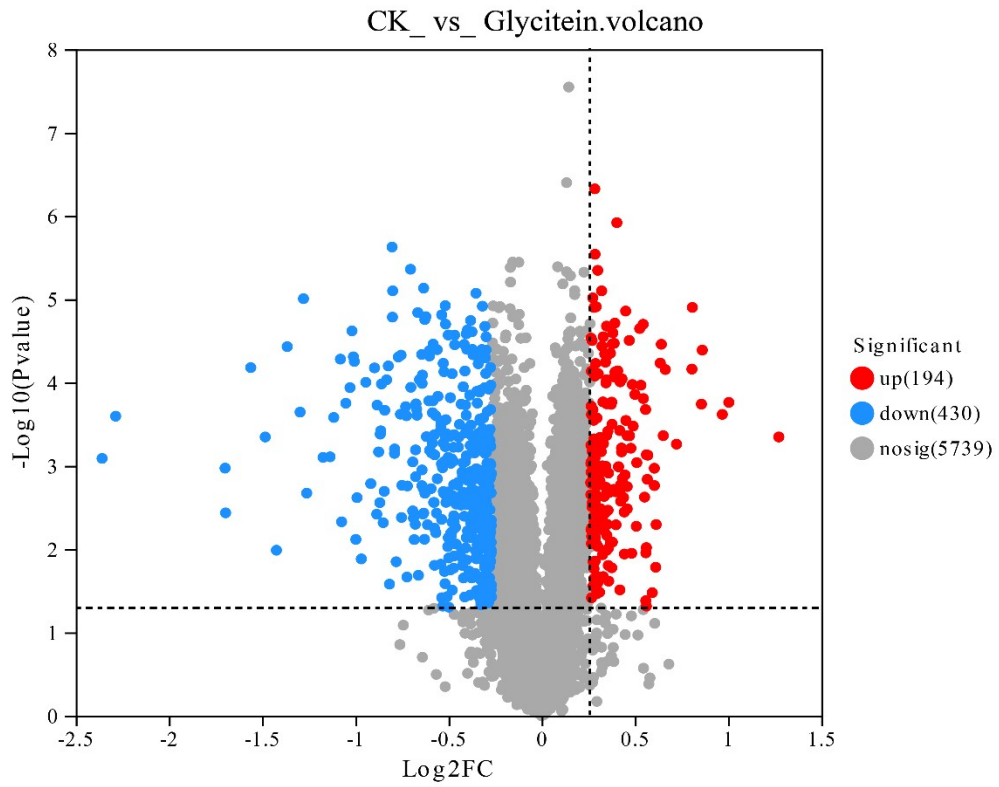

7

8 Fig.S2. (A) PCA analysis and (B) Volcano plot of DEPs based on proteomics data.

### Expression Correlation

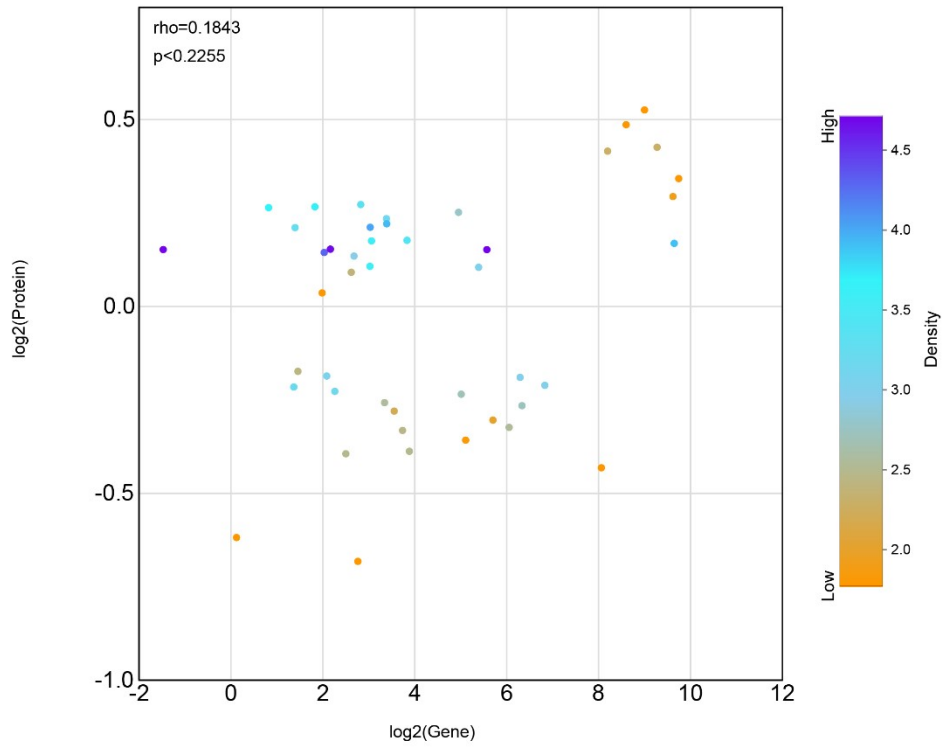

9

10 Fig. S3. Quantification relationship of transcriptomic and proteomic.

11

12

13

14

15

16

17

18

19

20

21

22

23

24

25

Table S1 Core DEGs related to reproductive process

| Gene name        | Gene description                                                        | FC    | Padjust              | Regulate |
|------------------|-------------------------------------------------------------------------|-------|----------------------|----------|
| <i>ptr-4</i>     | PaTched Related family                                                  | 2.339 | 3.36E <sup>-05</sup> | up       |
| <i>plx-2</i>     | Plexin-2                                                                | 2.049 | 1.07E <sup>-05</sup> | up       |
| <i>exc-9</i>     | Uncharacterized protein                                                 | 2.12  | 0.043634             | up       |
| <i>unc-10</i>    | Rab-3-interacting molecule unc-10                                       | 2.015 | 0.000156             | up       |
| <i>unc-7</i>     | Innexin                                                                 | 2.09  | 0.006792             | up       |
| <i>acn-1</i>     | Inactive angiotensin-converting enzyme-related protein                  | 2.025 | 0.000112             | up       |
| <i>eat-2</i>     | Neuronal acetylcholine receptor subunit eat-2                           | 2.647 | 0.027780             | up       |
| <i>col-81</i>    | COLlagen                                                                | 0.085 | 2.07E <sup>-07</sup> | down     |
| <i>Y73F8A.35</i> | Uncharacterized protein                                                 | 2.245 | 0.029226             | up       |
| <i>nphp-4</i>    | NePHronoPhthisis (human kidney disease) homolog                         | 2.167 | 0.016330             | up       |
| <i>ptr-18</i>    | PaTched Related family                                                  | 2.242 | 0.000732             | up       |
| <i>osm-8</i>     | Osmotic avoidance abnormal protein 8                                    | 3.336 | 0.000156             | up       |
| <i>glf-1</i>     | GaLactoFuranose synthesis<br>(UGM, UDP-galactopyranose mutase)          | 2.928 | 0.003286             | up       |
| <i>adt-1</i>     | A disintegrin and metalloproteinase with<br>thrombospondin motifs adt-1 | 2.586 | 0.004114             | up       |
| <i>try-5</i>     | TRYpsin-like protease                                                   | 2.186 | 0.002742             | up       |

26

27

28

Table S2 Core DEGs related to locomotion

| Gene name       | Gene description                         | FC    | Padjust  | Regulate |
|-----------------|------------------------------------------|-------|----------|----------|
| <i>unc-10</i>   | Rab-3-interacting molecule unc-10        | 2.015 | 0.000156 | up       |
| <i>osm-12</i>   | Bardet-Biedl syndrome 7 protein homolog  | 2.551 | 0.030322 | up       |
| <i>sol-1</i>    | Suppressor of lurcher protein 1          | 2.274 | 0.010961 | up       |
| <i>unc-7</i>    | Innexin                                  | 2.09  | 0.006792 | up       |
| <i>glr-1</i>    | Glutamate receptor 1                     | 3.331 | 0.002016 | up       |
| <i>F23H12.5</i> | Uncharacterized protein                  | 2.189 | 0.001504 | up       |
| <i>T14B4.19</i> | Uncharacterized protein                  | 3.467 | 0.000713 | up       |
| <i>odr-10</i>   | Serpentine receptor class r-10           | 2.268 | 0.036127 | up       |
| <i>pros-1</i>   | Homeobox protein prospero homolog 1      | 2.154 | 0.000128 | up       |
| <i>sup-9</i>    | Two pore potassium channel protein sup-9 | 2.138 | 0.031110 | up       |

29

30

31

Table S3 Core DEGs related to response to stimulus

| Gene name       | Gene description                                    | FC    | Padjust              | Regulate |
|-----------------|-----------------------------------------------------|-------|----------------------|----------|
| <i>abu-8</i>    | Activated in Blocked Unfolded protein response      | 2.714 | 0.012093             | up       |
| <i>cyp-35A3</i> | CYtochrome P450 family                              | 0.253 | 0.000424             | down     |
| <i>skpo-2</i>   | ShK domain and PerOxidase domain containing protein | 2.633 | 0.001361             | up       |
| <i>hot-2</i>    | Homolog of Odr-2 (Two)                              | 2.171 | 0.018906             | up       |
| <i>abu-10</i>   | Activated in Blocked Unfolded protein response      | 2.569 | 0.0008               | up       |
| <i>abu-11</i>   | Activated in Blocked Unfolded protein response      | 2.087 | 0.003284             | up       |
| <i>cyp-35C1</i> | CYtochrome P450 family                              | 0.466 | 2.86E <sup>-06</sup> | down     |
| <i>cyp-35A5</i> | CYtochrome P450 family                              | 0.468 | 0.009969             | down     |
| <i>cyp-35D1</i> | CYtochrome P450 family                              | 0.433 | 0.01792867           | down     |

32

33

Table S4 Core DEGs related to cellular component

| Gene name    | Gene description                             | FC    | Padjust              | Regulate |
|--------------|----------------------------------------------|-------|----------------------|----------|
| <i>eva-1</i> | Protein eva-1                                | 2.207 | 1.07E <sup>-06</sup> | up       |
| <i>dnj-4</i> | DNaJ domain (prokaryotic heat shock protein) | 0.447 | 0.002127             | up       |

34

35

36

Table S5 Core DEGs related to response to oxidative stress

| Gene name      | Gene description                                    | FC    | Padjust              | Regulate |
|----------------|-----------------------------------------------------|-------|----------------------|----------|
| <i>skpo-2</i>  | ShK domain and PerOxidase domain containing protein | 2.633 | 0.001361             | up       |
| <i>C46A5.4</i> | Uncharacterized protein                             | 2.429 | 4.43E <sup>-05</sup> | up       |

37

38

39

40

41

42

43

44

45

46

47 Table S6 Core DEGs related to response to oxidative stress based on KEGG databases

| Second Category                    | Number | Regulate | Genes                                                                                                                                          |
|------------------------------------|--------|----------|------------------------------------------------------------------------------------------------------------------------------------------------|
| Amino acid metabolism              | 1      | up       | <i>ech-9</i>                                                                                                                                   |
| Glycan biosynthesis and metabolism | 4      | up       | <i>bus-17</i> , <i>B0205.4</i> , <i>bus-8</i> , <i>bgnt-1.3</i>                                                                                |
| Lipid metabolism                   | 5      | up       | <i>ech-9</i> , <i>ace-3</i> , <i>lipl-6</i> , <i>T19H12.6</i> , <i>F13H10.5</i>                                                                |
| Signal transduction                | 9      | up       | <i>cdh-8</i> , <i>K07E8.6</i> , <i>prkl-1</i> , <i>ctbp-1</i> , <i>pros-1</i> , <i>daam-1</i> , <i>phg-1</i> , <i>igcm-1</i> , <i>C49H3.16</i> |
| Aging                              | 1      | up       | <i>lips-17</i>                                                                                                                                 |
| Development and regeneration       | 1      | up       | <i>plx-2</i>                                                                                                                                   |
| Endocrine system                   | 3      | up       | <i>unc-10</i> , <i>sup-9</i> , <i>acn-1</i>                                                                                                    |
| Glycan biosynthesis and metabolism | 4      | up       | <i>bus-17</i> , <i>B0205.4</i> , <i>bus-8</i> , <i>bgnt-1.3</i>                                                                                |

48

49

50 Table S7 Core DEPs based on GO pathway analysis

| GO ID      | GO Description                                                                     | Proteins                                   |
|------------|------------------------------------------------------------------------------------|--------------------------------------------|
| GO:0016021 | Integral component of membrane                                                     | LIN-15B, RPS-26, DPY-11, DHS-19, TXDC-12.1 |
| GO:0016705 | Oxidoreductase activity, acting on paired donors                                   | FAT-2, FAT-3, MTRR-1                       |
| GO:0005615 | Extracellular space                                                                | DDO-3, VIT-1, OST-1                        |
| GO:0005764 | Lysosome                                                                           | ASP-1                                      |
| GO:0016671 | Oxidoreductase activity, acting on a sulfur group of donors, disulfide as acceptor | MSRA-1                                     |
| GO:0006950 | Response to stress                                                                 | DNJ-10, PDE-2, FAT-6                       |
| GO:0008610 | Lipid biosynthetic process                                                         | LET-767, PMT-1                             |
| GO:0009605 | Response to external stimulus                                                      | PRMT-1                                     |
| GO:1904666 | Regulation of ubiquitin protein ligase activity                                    | APAT-3                                     |
| GO:0006573 | Valine metabolic process                                                           | ALH-8                                      |

51
